# Supplementary material
Source: ML conference proceedings conference paper supplement (https://proceedings.neurips.cc/paper_files/paper/2019/hash/d6288499d0083cc34e60a077b7c4b3e1-Abstract.html)
Supplement: Supplementary file [file d6288499d0083cc34e60a077b7c4b3e1-Supplemental.zip]

---

# Thinning for Accelerating the Learning of Point Processes (Supplementary Material)

---

**Lemma 3.2** (Thinned intensities). *Let  $\mathcal{F}$  and  $\mathcal{G}$  be the full history and thinned history with respect to a  $p$ -thinned process  $N_p(t)$ . Let  $\mathcal{H}$  be the internal history of  $N(t)$ . The following equalities hold:*

- (1)  $\lambda_p^{\mathcal{F}}(t) = p\lambda^{\mathcal{H}}(t)$ ;
- (2)  $\lambda_p^{\mathcal{G}}(t) = p\mathbb{E}[\lambda^{\mathcal{H}}(t)|\mathcal{G}]$ .

*Proof.* For (1), it can be obtained by taking expectation on both side of  $dN_p(t) = B_{N(t)}dN(t)$ :

$$\lambda_p^{\mathcal{F}}(t) = \mathbb{E}dN_p(t) = \mathbb{E}B_{N(t)}dN(t) = \lambda^{\mathcal{H}}(t). \quad (1)$$

For (2), Theorem 7.13 in [2] gives a solution to recover the point process given the thinned history be the following conditional expectation:

$$\mathbb{E}[N(t)|\mathcal{G}] = N_p(t) + \frac{1-p}{p} \int_0^t d\Lambda_p^{\mathcal{G}}(s). \quad (2)$$

Here,  $\Lambda_p^{\mathcal{G}}$  is the  $\mathcal{G}$ -compensator of the  $p$ -thinned process, which equals to  $\Lambda_p^{\mathcal{G}}(t) = \int_0^t \lambda_p^{\mathcal{G}}(s)ds$ . Further,

$$\begin{aligned} \mathbb{E}[\lambda^{\mathcal{H}}(t)|\mathcal{G}] &= \lim_{s \rightarrow 0} \frac{\mathbb{E}[N(t+s) - N(t)|\mathcal{G}]}{ds} \\ &= \lim_{s \rightarrow 0} \frac{\mathbb{E}[N_p(t+s) - N_p(t)|\mathcal{G}]}{ds} + \frac{1-p}{p} \lambda_p^{\mathcal{G}}(t) \\ &= \lambda_p^{\mathcal{G}}(t) + \frac{1-p}{p} \lambda_p^{\mathcal{G}}(t) \\ &= \frac{1}{p} \lambda_p^{\mathcal{G}}(t). \end{aligned}$$

where the desired result follows. □

**Lemma 4.1** (Thinning for parameter estimation of NHPP). *Consider an NHPP  $N(t)$  with deterministic intensity  $\lambda(t; \theta)$ ,  $t > 0$ ,  $\theta \in \mathbb{R}^d$ . If there exists an invertible linear operator  $\mathcal{A} : \mathbb{R}^d \rightarrow \mathbb{R}^d$  satisfying  $\lambda(t; \mathcal{A}\theta) = p\lambda(t; \theta)$ , then the  $M$ -estimator on thinned history can be written as  $\tilde{\theta}_{\mathcal{H}} = \mathcal{A}^{-1}\hat{\theta}_{\mathcal{G}}$  such that  $\mathbb{E}[\nabla R(\tilde{\theta}_{\mathcal{H}})|\mathcal{G}] \xrightarrow{p} 0$ , as the number of realizations  $n \rightarrow \infty$ .*

*Proof.* From Theorem 7.13 in [2] we have,

$$\begin{aligned}
\mathbb{E}[\nabla R(\tilde{\theta}_{\mathcal{H}})|\mathcal{G}] &= \mathbb{E}\left\{\frac{1}{p} \int_0^T H(t; \tilde{\theta}_{\mathcal{H}}) \left[ dN_p(t) - p\lambda(t; \tilde{\theta}_{\mathcal{H}})dt \right] \middle| \mathcal{G} \right\} \\
&= \frac{1}{p} \int_0^T H(t; \tilde{\theta}_{\mathcal{H}}) \left[ dN_p(t) - \lambda(t; \hat{\theta}_{\mathcal{G}})dt \right] \\
&= \frac{1}{p} \int_0^T H(t; \tilde{\theta}_{\mathcal{H}}) \left[ dN_p(t) - \lambda(t; \theta_{\mathcal{G}}^*)dt + \lambda(t; \theta_{\mathcal{G}}^*)dt - \lambda(t; \hat{\theta}_{\mathcal{G}})dt \right] \\
&= \frac{1}{p} \int_0^T H(t; \tilde{\theta}_{\mathcal{H}}) \left[ \lambda(t; \theta_{\mathcal{G}}^*)dt - \lambda(t; \hat{\theta}_{\mathcal{G}})dt \right] \xrightarrow{P} 0.
\end{aligned}$$

The last step is due to the asymptotic normality of M-estimator ([1]) that  $\hat{\theta}_{\mathcal{G}} \xrightarrow{P} \theta_{\mathcal{G}}^*$  as the number of realizations  $n \rightarrow \infty$ .  $\square$

**Theorem 4.3** (Thinning for parameter estimation of decouplable intensities). *Consider a point process  $N(t)$  with decouplable intensity. If there exist invertible linear operators  $\mathcal{A}$  and  $\mathcal{B}$  satisfying  $\mathcal{B}\mathbb{E}[m^{\mathcal{H}}(t)|\mathcal{G}] = m_p^{\mathcal{G}}(t)$ , where  $m_p^{\mathcal{G}}(t)$  is the component of thinned intensity  $\lambda_p^{\mathcal{G}}(t)$ , and  $p\mathcal{B}^{-1}g(t; \theta) = g(t; \mathcal{A}\theta)$ , then the M-estimator on thinned history can be written as  $\tilde{\theta}_{\mathcal{H}} = \mathcal{A}^{-1}\hat{\theta}_{\mathcal{G}}$  such that  $\mathbb{E}[\nabla R(\tilde{\theta}_{\mathcal{H}})|\mathcal{G}] \xrightarrow{P} 0$ , as the number of realizations  $n \rightarrow \infty$ . Particularly, if  $\lambda^{\mathcal{H}}(t; \theta)$  is linear, then  $\mathcal{A} = p\mathcal{B}^{-1}$ .*

*Proof.* The proof is similar with the NHPP one. By definition we have,

$$\begin{aligned}
\mathbb{E}[\nabla R(\tilde{\theta}_{\mathcal{H}})|\mathcal{G}] &= \frac{1}{p} \mathbb{E} \int_0^T \left\{ H^{\mathcal{H}}(t; \tilde{\theta}_{\mathcal{H}}) \left[ dN_p(t) - p\lambda^{\mathcal{H}}(t; \tilde{\theta}_{\mathcal{H}})dt \right] \middle| \mathcal{G} \right\} \\
&= \frac{1}{p} \int_0^T \mathbb{E} \left\{ H^{\mathcal{H}}(t; \tilde{\theta}_{\mathcal{H}}) | \mathcal{G} \right\} \mathbb{E} \left\{ dN_p(t) - p\lambda^{\mathcal{H}}(t; \tilde{\theta}_{\mathcal{H}})dt \middle| \mathcal{G} \right\}
\end{aligned}$$

By the definition of stochastic integral, it suffices to show that  $N_p(t) - \int p\lambda^{\mathcal{H}}(t; \tilde{\theta}_{\mathcal{H}})dt$  asymptotically converges to a martingale in probability.

$$\begin{aligned}
\mathbb{E} \left\{ dN_p(t) - p\lambda^{\mathcal{H}}(t; \tilde{\theta}_{\mathcal{H}})dt \middle| \mathcal{G} \right\} &= g(t; \theta^*)^T m^{\mathcal{G}}(t) - pg(t; \tilde{\theta}_{\mathcal{H}})^T \mathbb{E} [m^{\mathcal{H}}(t) | \mathcal{G}] \\
&= [g(t; \theta^*) - p\mathcal{B}^{-1}g(t; \tilde{\theta}_{\mathcal{H}})]^T m^{\mathcal{G}}(t) \\
&= [g(t; \theta^*) - g(t; \mathcal{A}\tilde{\theta}_{\mathcal{H}})]^T m^{\mathcal{G}}(t) \\
&= [g(t; \theta^*) - g(t; \hat{\theta}_{\mathcal{G}})]^T m^{\mathcal{G}}(t)
\end{aligned}$$

Since  $\hat{\theta}_{\mathcal{G}} \xrightarrow{P} \theta_{\mathcal{G}}^*$  as the number of realizations  $n \rightarrow \infty$ , and  $g$  is continuous with respect to  $\theta$ ,  $[g(t; \theta^*) - g(t; \hat{\theta}_{\mathcal{G}})]^T m^{\mathcal{G}}(t) \xrightarrow{P} 0$ , which is the desired result.  $\square$

**Theorem 5.1** (Thinning for gradient estimation). *Let  $N(t)$  be a point process with decouplable intensity  $\lambda^{\mathcal{H}}(t; \theta) = g(t; \theta)^T m^{\mathcal{H}}(t)$  in Eq. (4). If there exist invertible linear operators  $\mathcal{A}$  and  $\mathcal{B}$  satisfying  $\mathcal{B}\mathbb{E}[m^{\mathcal{H}}(t)|\mathcal{G}] = m_p^{\mathcal{G}}(t)$ , where  $m_p^{\mathcal{G}}(t)$  is the component of thinned intensity  $\lambda_p^{\mathcal{G}}(t)$ , and  $p\mathcal{B}^{-1}g(t; \theta) = g(t; \mathcal{A}\theta)$ , then*

$$(1) \mathbb{E}[\nabla R(\theta)|\mathcal{G}] \leq 1/p \mathcal{A}^{-1} \nabla R_p(\mathcal{A}\theta), \text{ for } R \text{ is LSE};$$

$$(2) \mathbb{E}[\nabla R(\theta)|\mathcal{G}] \leq \mathcal{A}^{-1} \nabla R_p(\mathcal{A}\theta), \text{ for } R \text{ is MLE}.$$

Particularly, if the intensity is deterministic, i.e.,  $m^{\mathcal{H}}(t) = 1$ , both equalities hold.

*Proof.* By definition of stochastic integral, we have

$$\begin{aligned}
\mathbb{E}[\nabla R(\theta)|\mathcal{G}] &= \mathbb{E} \left\{ \int_0^T H^{\mathcal{H}}(t; \theta) \left[ dN(t) - \lambda^{\mathcal{H}}(t; \theta)dt \right] \middle| \mathcal{G} \right\} \\
&= \mathbb{E} \left\{ \int_0^T H^{\mathcal{H}}(t; \theta) dN(t) \middle| \mathcal{G} \right\} - \mathbb{E} \left\{ \int_0^T H^{\mathcal{H}}(t; \theta) \lambda^{\mathcal{H}}(t; \theta)dt \middle| \mathcal{G} \right\}
\end{aligned}$$

Here the second term can be bounded by,

$$\mathbb{E} \{ H^{\mathcal{H}}(t; \theta) \lambda^{\mathcal{H}}(t; \theta) dt | \mathcal{G} \} \geq \mathbb{E} \{ H^{\mathcal{H}}(t; \theta) | \mathcal{G} \} \mathbb{E} \{ \lambda^{\mathcal{H}}(t; \theta) dt | \mathcal{G} \}$$

According to the definition of forward stochastic integral, the first term can be written as,

$$\mathbb{E} \left\{ \int_0^T H^{\mathcal{H}}(t; \theta) dN(t) | \mathcal{G} \right\} = \int_0^T \mathbb{E} \{ H^{\mathcal{H}}(t; \theta) | \mathcal{G} \} \mathbb{E} \{ dN(t) | \mathcal{G} \}$$

Let's look at these components one by one. The condition of the theorem yields,

$$\begin{aligned} \mathbb{E} \{ \lambda^{\mathcal{H}}(t; \theta) dt | \mathcal{G} \} &= g(t; \theta)^T \mathbb{E} [m^{\mathcal{H}}(t) | \mathcal{G}] dt \\ &= p \mathcal{B}^{-1} g(t; \theta)^T m^{\mathcal{G}}(t) dt \\ &= g(t; \mathcal{A}\theta)^T m^{\mathcal{G}}(t) dt \\ &= \lambda^{\mathcal{G}}(t; \mathcal{A}\theta) dt \end{aligned} \quad (3)$$

and,

$$\mathbb{E} \{ dN(t) | \mathcal{G} \} = \frac{1}{p} dN_p(t). \quad (4)$$

If R is LSE, then we have,

$$\begin{aligned} \mathbb{E} [H^{\mathcal{H}}(t; \theta) | \mathcal{G}] &= \nabla \mathbb{E} [\lambda^{\mathcal{H}}(t; \theta) | \mathcal{G}] \\ &= \nabla_{\theta} \frac{1}{p} g(t; \mathcal{A}\theta)^T m_p^{\mathcal{G}}(t) \\ &= \mathcal{A}^{-1} \nabla \frac{1}{p} g(t; \mathcal{A}\theta)^T m_p^{\mathcal{G}}(t) \\ &= \mathcal{A}^{-1} H_p^{\mathcal{G}}(t; \mathcal{A}\theta) \end{aligned} \quad (5)$$

Thus, combining Eq.(3),(4) and (5) yields,

$$\begin{aligned} \mathbb{E} [\nabla R(\theta) | \mathcal{G}] &\leq \frac{1}{p^2} \mathcal{A}^{-1} \int_0^T H_p^{\mathcal{G}}(t; \mathcal{A}\theta) [dN_p(t) - \lambda_p^{\mathcal{G}}(t; \mathcal{A}\theta) dt] \\ &= \frac{1}{p} \mathcal{A}^{-1} \nabla R_p(\mathcal{A}\theta). \end{aligned}$$

If R is MSE, then we have,

$$\begin{aligned} \mathbb{E} [H^{\mathcal{H}}(t; \theta) | \mathcal{G}] &= \nabla \mathbb{E} [\log \lambda^{\mathcal{H}}(t; \theta) | \mathcal{G}] \\ &\geq \nabla_{\theta} \log [g(t; \mathcal{A}\theta)^T m_p^{\mathcal{G}}(t)] \\ &= \mathcal{A}^{-1} \nabla \log [g(t; \mathcal{A}\theta)^T m_p^{\mathcal{G}}(t)] \\ &= \mathcal{A}^{-1} H_p^{\mathcal{G}}(t; \mathcal{A}\theta) \end{aligned} \quad (6)$$

Combining Eq.(3) and Eq.(6) yields the second conclusion,

$$\begin{aligned} \mathbb{E} [\nabla R(\theta) | \mathcal{G}] &\leq \frac{1}{p} \mathcal{A}^{-1} \int_0^T H_p^{\mathcal{G}}(t; \mathcal{A}\theta) [dN_p(t) - \lambda_p^{\mathcal{G}}(t; \mathcal{A}\theta) dt] \\ &= \mathcal{A}^{-1} \nabla R_p(\mathcal{A}\theta). \end{aligned}$$

The proof ends here.  $\square$

**Theorem 5.2** (Variance of gradient estimation). *Let  $\nabla \hat{R}^{\mathcal{G}}(\theta)$  and  $\nabla R_{\ell}(\theta)$  be the  $p$ -thinned and sub-interval gradient at  $\theta$ , where  $\nabla \hat{R}^{\mathcal{G}}(\theta) = 1/p \mathcal{A}^{-1} \nabla R_p(\mathcal{A}\theta)$  for LSE and  $\nabla \hat{R}^{\mathcal{G}}(\theta) = \mathcal{A}^{-1} \nabla R_p(\mathcal{A}\theta)$  for MLE. The variance of  $p$ -thinned gradient is no greater than that of sub-interval gradient:*

$$\mathbb{V} [\nabla \hat{R}^{\mathcal{G}}(\theta)] \leq \mathbb{V} [\nabla R_{\ell}(\theta)]. \quad (7)$$

*Proof.* For the RHS, using the law of total variance yields,

$$\mathbb{V}[\nabla R_\ell(\theta)] = \mathbb{E}\left\{\mathbb{V}[\nabla R_\ell(\theta)|\mathcal{F}]\right\} + \mathbb{V}\left\{\mathbb{E}[\nabla R_\ell(\theta)|\mathcal{F}]\right\}.$$

The first term can be rewritten as,

$$\begin{aligned}\mathbb{E}\left\{\mathbb{V}[\nabla R_\ell(\theta)|\mathcal{F}]\right\} &= \frac{1-p}{p}\mathbb{E}\left\{\int_0^T H^{\mathcal{H}}(t; \theta) [dN(t) - \lambda^{\mathcal{H}}(t; \theta) dt]\right\}^2 \\ &= \frac{1-p}{p}\mathbb{E}[\nabla R(\theta)]^2,\end{aligned}$$

The second term can be written as,

$$\mathbb{V}\left\{\mathbb{E}[\nabla R_\ell(\theta)|\mathcal{F}]\right\} = \mathbb{V}[\nabla R(\theta)].$$

Thus, the total variance of  $\nabla R_\ell(\theta)$  can be written as,

$$\mathbb{V}[\nabla R_\ell(\theta)] = \frac{1-p}{p}\mathbb{E}[\nabla R(\theta)]^2 + \mathbb{V}[\nabla R(\theta)].$$

Then we consider the LHS, by the definition of variance,

$$\mathbb{V}[\nabla \hat{R}^G(\theta)] = \mathbb{E}[\nabla \hat{R}^G(\theta)]^2 - [\mathbb{E}\nabla \hat{R}^G(\theta)]^2. \quad (8)$$

Apply Theorem ??, we have,

$$[\mathbb{E}\nabla \hat{R}^G(\theta)]^2 \geq [\mathbb{E}\nabla R(\theta)]^2. \quad (9)$$

For LSE, since quadratic function is convex, we obtain  $\mathbb{E}[H_p^G(t; \mathcal{A}\theta)]^2 \leq \mathbb{E}[H^{\mathcal{H}}(t; \theta)]^2$ . This equivalence also holds for MLE, we omit the proof, since it can be proved similarly. Further, we obtain,

$$\begin{aligned}\mathbb{E}[\nabla \hat{R}^G(\theta)]^2 &= \frac{1}{p^2} \mathcal{A}^{-1} \mathbb{E}\left[\int_0^T H_p^G(t; \mathcal{A}\theta) [dN_p(t) - \lambda_p^G(t; \mathcal{A}\theta) dt]\right]^2 (\mathcal{A}^{-1})^T \\ &= \frac{1}{p^2} \mathcal{A}^{-1} \mathbb{E}\left[\int_0^T H_p^G(t; \mathcal{A}\theta) [dN_p(t) - \lambda_p^G(t; \theta_g^*) dt + \lambda_p^G(t; \theta_g^*) dt - \lambda_p^G(t; \mathcal{A}\theta) dt]\right]^2 (\mathcal{A}^{-1})^T \\ &= \frac{1}{p^2} \mathcal{A}^{-1} \mathbb{E}\left\{\int_0^T H_p^G(t; \mathcal{A}\theta) [dN_p(t) - \lambda_p^G(t; \theta_g^*) dt]\right\}^2 (\mathcal{A}^{-1})^T + \\ &\quad \frac{1}{p^2} \mathcal{A}^{-1} \mathbb{E}\left\{\int_0^T H_p^G(t; \mathcal{A}\theta) [\lambda_p^G(t; \mathcal{A}\theta_g^*) - \lambda_p^G(t; \mathcal{A}\theta)] dt\right\}^2 (\mathcal{A}^{-1})^T\end{aligned} \quad (10)$$

The first term,

$$\begin{aligned}&\frac{1}{p^2} \mathcal{A}^{-1} \mathbb{E}\left\{\int_0^T H_p^G(t; \mathcal{A}\theta) [dN_p(t) - \lambda_p^G(t; \theta_g^*) dt]\right\}^2 (\mathcal{A}^{-1})^T \\ &= \frac{1}{p^2} \mathcal{A}^{-1} \mathbb{E}\left\{\int_0^T [H_p^G(t; \mathcal{A}\theta)]^2 dN_p(t)\right\} (\mathcal{A}^{-1})^T \\ &\leq \frac{1}{p^2} \mathbb{E}\left\{\int_0^T [H^{\mathcal{H}}(t; \theta)]^2 dN_p(t)\right\} \\ &= \frac{1}{p} \mathbb{E}\int_0^T [H^{\mathcal{H}}(t; \theta)]^2 dN(t)\end{aligned} \quad (11)$$

The second term,

$$\begin{aligned}&\frac{1}{p^2} \mathcal{A}^{-1} \mathbb{E}\left\{\int_0^T H_p^G(t; \mathcal{A}\theta) [\lambda_p^G(t; \mathcal{A}\theta_g^*) - \lambda_p^G(t; \mathcal{A}\theta)] dt\right\}^2 (\mathcal{A}^{-1})^T \\ &\leq \frac{1}{p} \mathbb{E}\left\{\int_0^T H^{\mathcal{H}}(t; \theta) [\lambda^{\mathcal{H}}(t; \theta_g^*) - \lambda^{\mathcal{H}}(t; \theta)] dt\right\}^2\end{aligned} \quad (12)$$

Substituting Eq. (11) and (12) to Eq. 10 yields

$$\begin{aligned}
\mathbb{E}[\nabla \hat{R}^S(\theta)]^2 &\leq \frac{1}{p} \mathbb{E} \int_0^T [H^{\mathcal{H}}(t; \theta)]^2 dN(t) + \frac{1}{p} \mathbb{E} \left\{ \int_0^T H^{\mathcal{H}}(t; \theta) [\lambda^{\mathcal{H}}(t; \theta_{\mathcal{H}}^*) - \lambda^{\mathcal{H}}(t; \theta)] dt \right\}^2 \\
&= \frac{1}{p} \mathbb{E} \left\{ \int_0^T H^{\mathcal{H}}(t; \theta) [dN(t) - \lambda^{\mathcal{H}}(t; \theta_{\mathcal{H}}^*) dt] \right\}^2 \\
&= \mathbb{E}[\nabla R(\theta)]^2.
\end{aligned} \tag{13}$$

Combine Eq.(13) and Eq.(10) to Eq.(8),

$$\begin{aligned}
\mathbb{V}[\nabla \hat{R}^S(\theta)] &\leq \frac{1}{p} \mathbb{E}[\nabla R(\theta)]^2 - [\mathbb{E} \nabla R(\theta)]^2 \\
&= \frac{1-p}{p} \mathbb{E}[\nabla R(\theta)]^2 + \mathbb{E}[\nabla R(\theta)]^2 - [\mathbb{E} \nabla R(\theta)]^2 \\
&= \frac{1-p}{p} \mathbb{E}[\nabla R(\theta)]^2 + \mathbb{V}[\nabla R(\theta)] \\
&= \mathbb{V}[\nabla R_\ell(\theta)],
\end{aligned}$$

which is the desired result.  $\square$

## References

- [1] Per K Andersen, Ornulf Borgan, Richard D Gill, and Niels Keiding. *Statistical models based on counting processes*. Springer Science & Business Media, 2012.
- [2] Alan Karr. *Point Processes and Their Statistical Inference*, volume 7. CRC Press, 1991.
